# Supplementary material
Source: ML conference proceedings conference paper supplement (https://proceedings.mlr.press/v108/wang20c.html)
Supplement: Supplementary file 1 [file wang20c-supp.pdf]

---

# Supplementary Material for: Neural Topic Model with Attention for Supervised Learning

---

## 1 Detailed model inference

Starting from Equation (8), we can perform the reparameterization trick as below:

$$\begin{aligned}\log p_{\Theta, \Psi}(l, \mathbf{d}) &= \log \int_{\mathbf{t}} \frac{p_{\Theta}(\mathbf{t})}{q_{\Phi}(\mathbf{t}|\mathbf{d})} q_{\Phi}(\mathbf{t}|\mathbf{d}) p_{\Psi}(l|\mathbf{t}) p_{\Theta}(\mathbf{d}|\mathbf{t}) d\mathbf{t} \\ &= \log \mathbb{E}_{q_{\Phi}(\mathbf{t}|\mathbf{d})} \left[ \frac{p_{\Theta}(\mathbf{t})}{q_{\Phi}(\mathbf{t}|\mathbf{d})} p_{\Psi}(l|\mathbf{t}) p_{\Theta}(\mathbf{d}|\mathbf{t}) \right] \\ &= \mathbb{E}_{q_{\Phi}(\mathbf{t}|\mathbf{d})} \left[ \log p_{\Theta}(\mathbf{d}|\mathbf{t}) - \log \frac{q_{\Phi}(\mathbf{t}|\mathbf{d})}{p_{\Theta}(\mathbf{t})} + \log p_{\Psi}(l|\mathbf{t}) \right] \\ &= \mathbb{E}_{q_{\Phi}(\mathbf{t}|\mathbf{d})} \left[ \log p_{\Theta}(\mathbf{d}, \mathbf{t}) - \log q_{\Phi}(\mathbf{t}|\mathbf{d}) + \log p_{\Psi}(l|\mathbf{t}) \right] \\ &\quad + \text{KL}(q_{\Phi}(\mathbf{t}|\mathbf{d}) || p_{\Theta}(\mathbf{t}|\mathbf{d}))\end{aligned}\tag{1}$$

Where  $\Psi$  represents all the parameter from the RNN attention model.  $\Theta$  are the generative parameters and  $\Phi$  are the variational parameters.  $\mu_0, \sigma_0$  are omitted because they are constants. Since  $\beta \subset \Theta$ ,  $\beta$  is omitted too.

Since KL-divergence is always non-negative, we construct the variational objective function, also called the evidence lower bound (ELBO) of  $\log p_{\Theta, \Psi}(l, \mathbf{d})$  as below:

$$\begin{aligned}\mathcal{L} &= \mathbb{E}_{q_{\Phi}(\mathbf{t}|\mathbf{d})} \left[ \log p_{\Theta}(\mathbf{d}, \mathbf{t}) - \log q_{\Phi}(\mathbf{t}|\mathbf{d}) + \log p_{\Psi}(l|\mathbf{t}) \right] \\ &= \mathbb{E}_{q_{\Phi}(\mathbf{t}|\mathbf{d})} \left[ \log p_{\Theta}(\mathbf{d}|\mathbf{t}) + \log p_{\Psi}(l|\mathbf{t}) \right] \\ &\quad - \text{KL}(q_{\Phi}(\mathbf{t}|\mathbf{d}) || p(\mathbf{t}))\end{aligned}\tag{2}$$
